# Supplementary material
Source: publisher site journal article supplement (https://www.dovepress.com/article/603901)
Supplement: Supplementary file 1 [file 603901%20Revised%20Table%20A1.docx]

**Supplemental File**

**Table A1 Measurement items in this study**

| **Construct** | **Measurement Items** | **Reference** |
| --- | --- | --- |
| Low carbon consumption intention (LCI) | To reduce environmental risks, ______  LCI1: I would like to buy energy-saving appliances (i.e., air conditioners and refrigerators) for low-carbon consumption.  LCI2: The home appliances, kitchen, and bathroom facilities purchased by my family are mostly energy-saving.  LCI3: I would like to buy a new energy vehicle rather than a fuel car for low-carbon consumption.  LCI4: I pay attention to turning off the power when the appliance is not in use, instead of letting it stand by. | (Cheng et al., 2023)23;  (Mi et al., 2019)3 |
| Attitude (ATT) | ATT1: I think it's very pleasant to perform low-carbon consumption behavior for reducing environmental health risks.  ATT2: I think it is wise to perform low-carbon consumption behavior for reducing environmental health risks.  ATT3: I think low-carbon consumption behavior is beneficial to everyone for reducing environmental health risks. | (Gansser & Reich, 2023)28 |
| Subjective norms (SN) | SN1: The consumption mode of my family or friends who are important to me affects my consumption choices.  SN2: The green consumption learned from the TV media influences me, making me more willing to buy low-carbon products.  SN3: Under the pressure of global warming, I will participate in low-carbon consumption behavior. | (Gansser & Reich, 2023)28 |
| Perceived behavioral control (PBC) | PBC1: It is easy for me to participate in low-carbon consumption behaviors for reducing environmental health risks.  PBC2: Even if I feel obstacles or troubles, I will not give up performing low-carbon consumption behaviors for reducing environmental health risks. | (Liao et al., 2023)29 |
| Peer imitation (PI) | PI1: When my peers adopt low-carbon behaviors or browse low-carbon messages for reducing environmental health risks, I feel like I want to replicate their activities.  PI2: When my peers engage in low-carbon activities or games for reducing environmental health risks, I want to imitate them.  PI3: When my peers buy low-energy green products for reducing environmental health risks, I feel like I want to follow them. | (Xu et al., 2017)17 |
| Endorsement influence (EI) | EI1: Recommendations shared by experts regarding low-carbon consumption for reducing environmental health risks get my attention.  EI2: Recommendations provided by celebrities about low-carbon consumption for reducing environmental health risks attract me.  EI3: Endorsement activities about low-carbon consumption for reducing environmental health risks interest me. | (Xu et al., 2017)17 |
| Environmental concern (EC) | EC1: I think industrial development has caused serious pollution to the environment  EC2: I am very concerned about the deterioration of environmental quality  EC3: I often think about how to improve the quality of the environment | (Liu et al., 2022)30 |
